# Supplementary material for: Atomic Model of the Tailed Lactococcal Phage TP901-1 as Predicted by AlphaFold2: Revelations and Limitations
Source: Preprints.org preprint supplement (doi:10.20944/preprints202311.0819.v1), 2023-11-13
Supplement: Supplementary file 1 [file supplementary]

Archive with 4 entries (4 files):
- Supplementary Figures.pdf
- __MACOSX/._Supplementary Figures.pdf
- Supplementary-Movie-1.mp4
- __MACOSX/._Supplementary-Movie-1.mp4
